# Supplementary material
Source: PubMed Central journal article supplement (PMC4976693)
Supplement: NIHMS807433-supplement-Supplemental.pdf [file NIHMS807433-supplement-Supplemental.pdf]

Crystal structure of *Clostridium difficile* Toxin AChumbler, Rutherford, *et al.*

Supplementary information Table 1: Data collection and refinement statistics.

|                                                                      | Native                           | HgCl <sub>2</sub> (90 min) | HgCl <sub>2</sub> (3 days) | S1329C HgCl <sub>2</sub><br>(3 days) |
|----------------------------------------------------------------------|----------------------------------|----------------------------|----------------------------|--------------------------------------|
| <b>Data collection</b>                                               |                                  |                            |                            |                                      |
| Wavelength (Å)                                                       | 1.28149                          | 1.00273                    | 1.00275                    | 1.00798                              |
| Cell dimensions                                                      |                                  |                            |                            |                                      |
| <i>a</i> , <i>b</i> , <i>c</i> (Å)                                   | 303.61,<br>124.54, 75.98         | 300.34,<br>123.80, 75.83   | 302.0, 123.99,<br>75.76    | 300.87,<br>124.34, 76.34             |
| $\alpha$ , $\beta$ , $\gamma$ (°)                                    | 90, 97.5, 90                     | 90, 98.0, 90               | 90, 97.73, 90              | 90, 97.5, 90                         |
| Resolution (Å)                                                       | 50.0-3.25 (3.31-<br>3.25)*       | 50.0-3.6 (3.66-<br>3.6)    | 50.0-3.8 (3.87-<br>3.8)    | 50.0-4.15 (4.22-<br>4.15)            |
| <i>R</i> <sub>merge</sub>                                            | 6.2 (63.4)                       | 6.9 (50.7)                 | 8.0 (68.2)                 | 8.7 (57.1)                           |
| <i>I</i> / $\sigma$ <i>I</i>                                         | 21.0 (2.5)                       | 9.6 (1.8)                  | 10.3 (1.9)                 | 10.4 (2.3)                           |
| Completeness (%)                                                     | 100 (99.9)                       | 99.3 (99.3)                | 99.8 (99.8)                | 99.7 (99.5)                          |
| Redundancy                                                           | 6.0 (6.0)                        | 2.7 (2.7)                  | 3.8 (3.8)                  | 5.1 (5.1)                            |
| <hr/>                                                                |                                  |                            |                            |                                      |
|                                                                      | K <sub>2</sub> PtCl <sub>6</sub> | HAuCl <sub>4</sub>         |                            |                                      |
| Wavelength (Å)                                                       | 1.06578                          | 1.03501                    |                            |                                      |
| Cell dimensions                                                      |                                  |                            |                            |                                      |
| <i>a</i> , <i>b</i> , <i>c</i> (Å)                                   | 315.88,<br>123.41, 75.43         | 297.66,<br>123.92, 75.52   |                            |                                      |
| $\alpha$ , $\beta$ , $\gamma$ (°)                                    | 90, 97, 90                       | 90, 98.2, 90               |                            |                                      |
| Resolution (Å)                                                       | 50.0-4.1 (4.17-<br>4.1)          | 50.0-3.5 (3.56-<br>3.5)    |                            |                                      |
| <i>R</i> <sub>merge</sub>                                            | 5.4 (51.9)                       | 6.1 (44.1)                 |                            |                                      |
| <i>I</i> / $\sigma$ <i>I</i>                                         | 15.9 (2.2)                       | 16.0 (2.5)                 |                            |                                      |
| Completeness (%)                                                     | 99.9 (100.0)                     | 99.4 (95.8)                |                            |                                      |
| Redundancy                                                           | 4.0 (4.0)                        | 5.2 (4.5)                  |                            |                                      |
| <hr/>                                                                |                                  |                            |                            |                                      |
| <b>Refinement</b>                                                    |                                  |                            |                            |                                      |
| Resolution (Å)                                                       | 50-3.26                          |                            |                            |                                      |
| No. reflections                                                      | 43,813                           |                            |                            |                                      |
| <i>R</i> <sub>work</sub> / <i>R</i> <sub>free</sub> <sup>†</sup> (%) | 18.21/23.74                      |                            |                            |                                      |
| No. atoms                                                            | 14412                            |                            |                            |                                      |
| Protein                                                              | 14411                            |                            |                            |                                      |
| Zinc                                                                 | 1                                |                            |                            |                                      |
| Water                                                                | 0                                |                            |                            |                                      |
| B-factors (Å <sup>2</sup> )                                          |                                  |                            |                            |                                      |
| Wilson B                                                             | 106.15                           |                            |                            |                                      |
| Protein                                                              | 123.95                           |                            |                            |                                      |
| Zinc                                                                 | 146.46                           |                            |                            |                                      |
| R.m.s deviations                                                     |                                  |                            |                            |                                      |
| Bond lengths (Å)                                                     | 0.018                            |                            |                            |                                      |
| Bond angles (°)                                                      | 1.975                            |                            |                            |                                      |

\*Highest resolution shell is shown in parenthesis.

<sup>†</sup> Rfree calculated with 4.57% of the reflections (2002) that were omitted from the refinement process.

**Supplementary information Table 2:** Alignment of enzymatic domains to isolated domain structures.

| Toxin | Ligands          | PDB ID | Rmsd Å <sup>2</sup> | No of Cα atoms | Reference          |
|-------|------------------|--------|---------------------|----------------|--------------------|
| TcdA  | Apo              | 4DMV   | 0.65                | 428            | <a href="#">46</a> |
| TcdA  | Apo              | 3SS1   | 0.78                | 484            | <a href="#">24</a> |
| TcdA  | UDP, Mn          | 4DMW   | 0.7                 | 430            | <a href="#">46</a> |
| TcdA  | UDP-glucose, Mn  | 3SRZ   | 0.92                | 455            | <a href="#">24</a> |
| TcdB  | UDP, glucose, Mn | 2BVL   | 1.22                | 469            | <a href="#">47</a> |
| TcsL  | UDP-glucose, Mn  | 2VKD   | 0.96                | 461            | <a href="#">48</a> |
| Tcna  | Apo              | 2VK9   | 1.99                | 420            | <a href="#">48</a> |

**Supplementary information Table 3:** Zinc to protein ratios determined by ICP-MS

| Sample*                                        | Zinc/Protein |      |      | Sample                         | Zinc/Protein |      |     |
|------------------------------------------------|--------------|------|------|--------------------------------|--------------|------|-----|
| TcdA <sub>1795</sub>                           | 0.8          | 0.83 | 0.72 | TcdB                           | 0.74         | 0.68 | 0.6 |
| TcdA <sub>1795</sub> C700A                     | 0.08         |      |      | TcdB C698A                     | 0.09         |      |     |
| TcdA <sub>1795</sub> H655A                     | 0.06         |      |      | TcdB H653A                     | 0.04         |      |     |
| TcdA <sub>1795</sub> H759A                     | 0.3          |      |      | TcdB H757A                     | 0.12         | 0.31 | 0.5 |
|                                                |              |      |      |                                |              |      |     |
| TcdA <sub>1795</sub> + InsP6                   | 0.57         | 0.51 |      | TcdB + InsP6                   | 0.45         | 0.55 |     |
| TcdA <sub>1795</sub> + TPEN                    | 0.04         |      |      | TcdB + TPEN                    | 0.05         |      |     |
| TcdA <sub>1795</sub> (apo) + ZnCl <sub>2</sub> | 0.48         |      |      | TcdB (apo) + ZnCl <sub>2</sub> | 0.38         |      |     |

\* Each entry represents a measurement from a unique protein preparation.

**Supplementary information Table 4:** Primers used to generate the plasmids for this study.

| Protein                                 | Plasmid | Primers                                                                                                              |
|-----------------------------------------|---------|----------------------------------------------------------------------------------------------------------------------|
| TcdA <sub>1832</sub><br>S1329C          | pBL578  | 5'-CTTACTCTTTATTATTATGTTTCATATCCAATATCAACG-3'<br>5'-CGTTGATATTGGATATGAACATAATAATAAAGAGTAAG-3'                        |
| TcdA <sub>1795</sub>                    | pBL656  | 5'-GATATTAAAAACTATCATTAGGATATATAATGAGTGGAGGGCATGCCGGC-3'<br>5'-GCCGGCATGCCCTCCACTCATTATATATCCTAATGATAGTTTTTAATATC-3' |
| TcdA <sub>1795</sub><br>C700A           | pBL712  | 5'-GTAGAAGTAACTTACTTGGAGCTAATATGTTTAGTTATGATTTTAATG-3'<br>5'-CATTAAATCATAACTAAACATATTAGCTCCAAGTAAGTTTACTTCTAC-3'     |
| TcdA <sub>1795</sub><br>H655A           | pBL713  | 5'-GTAAGAAGTAACCTTTATTGGAGCGGGTAAAGATGAATTCAAC-3'<br>5'-GTTGAATTCATCTTTACCCGCTCCAATAAAGGTTACTTTTAC-3'                |
| TcdA <sub>1795</sub><br>H759A           | pBL714  | 5'-GAAAAGAAGTCTTGCTGCGTCAGGTAATGGATAAATAAAG-3'<br>5'-CTTTATTTATCCATTTACCTGACGCAGCCAGAAGTTCTTTTC-3'                   |
| TcdB<br>H757A                           | pBL689  | 5'-GGAAGAAGAGAATTATTGGATGCGTCTGGTGAATGGATAAATAAAG-3'<br>5'-CTTTATTTATCCATTCACCAGACGCATCCAATAATTCTTCTTCC-3'           |
| TcdASAS<br>V1109S,<br>N1110A,<br>N1111S | pBL675  | 5'-GCAGGAATACCTTCATTATCTGCTTCTGAATTAATATTGCATGATAAGGC-3'<br>5'-GCCTTATCATGCAATATTAATTCAGAAGCAGATAATGAAGGTATTCCTGC-3' |

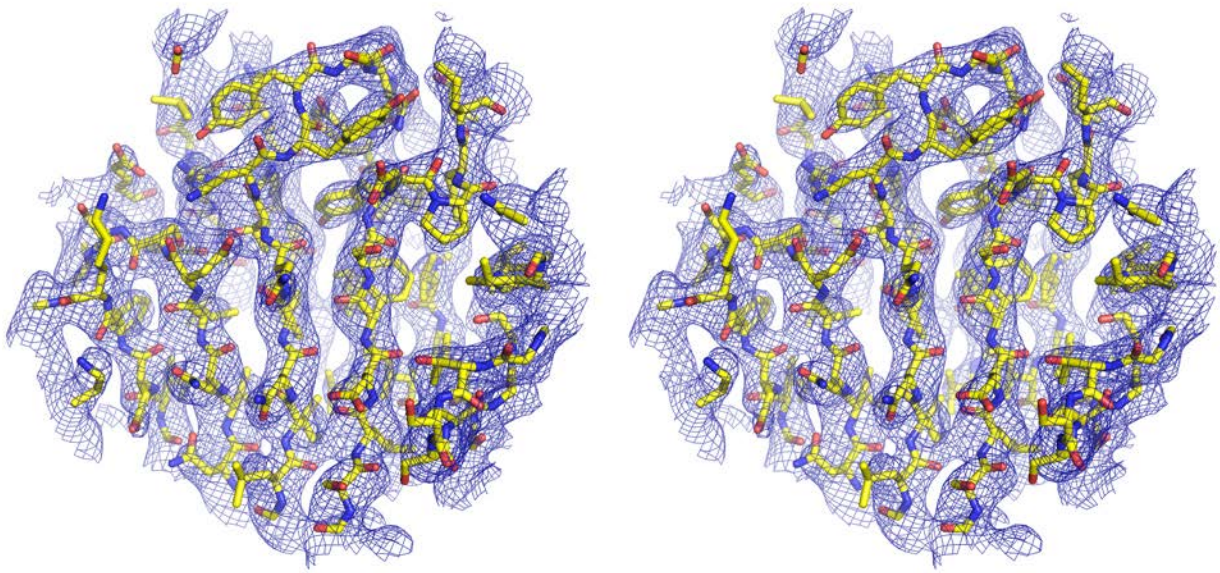

**Supplementary information Figure 1: Wall-eyed stereo view of representative electron density.**

Weighted 2Fo-Fc map contoured at 1 sigma.

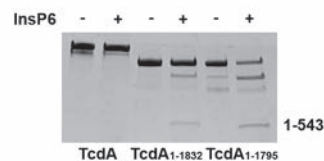

**Supplementary information Figure 2: A truncated TcdA construct (TcdA<sub>1795</sub>) undergoes autoprocessing more efficiently than TcdA and TcdA<sub>1832</sub>.** The three proteins were incubated with or without 10 mM InsP6 for 2 hours in a buffer containing 20 mM HEPES pH 6.9, 50 mM NaCl and then subjected to SDS-PAGE. Autoprocessing was most efficient in the TcdA<sub>1795</sub> sample. Gel is representative of three independent experiments.

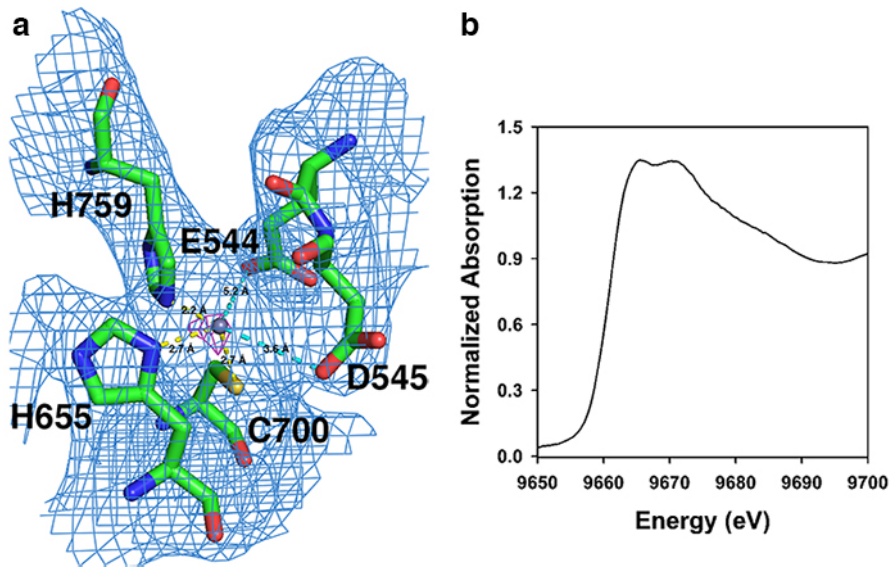

**Supplementary information Figure 3: Zinc is present in the APD active sites of TcdA.** **a.** Analysis of the anomalous zinc signal, reveals a single peak, shown here in purple at 7 sigma, located in the APD active site. The zinc is coordinated by H655 (2.7 Å), C700 (2.7 Å), and H759 (2.2 Å) and may have indirect contacts with E544 or D545. The blue mesh depicts a weighted 2Fo-Fc map contoured around the 5 active site amino acids at 1 sigma. **b.** X-ray absorption near-edge spectrum of TcdA in solution.

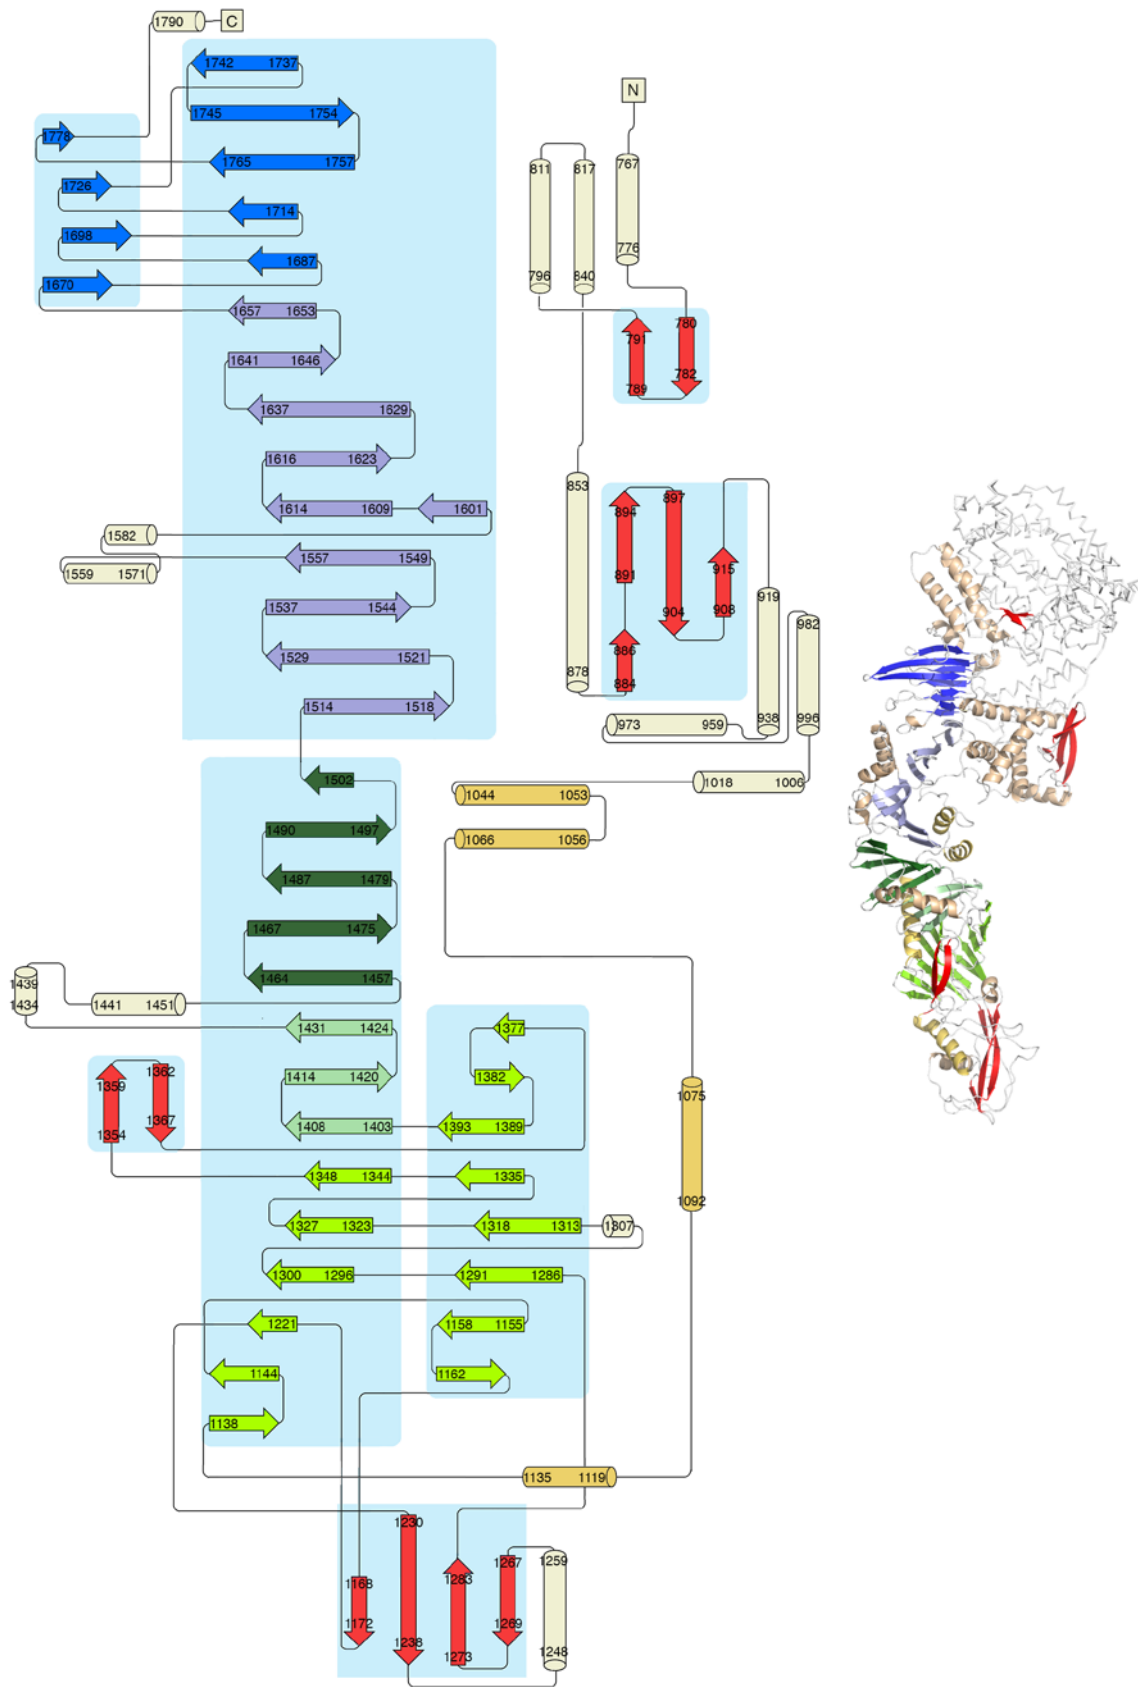

**Supplementary information Figure 4: Topology of the TcdA delivery domain.** Cylinders indicate  $\alpha$ -helices, arrows represent  $\beta$ -strands.

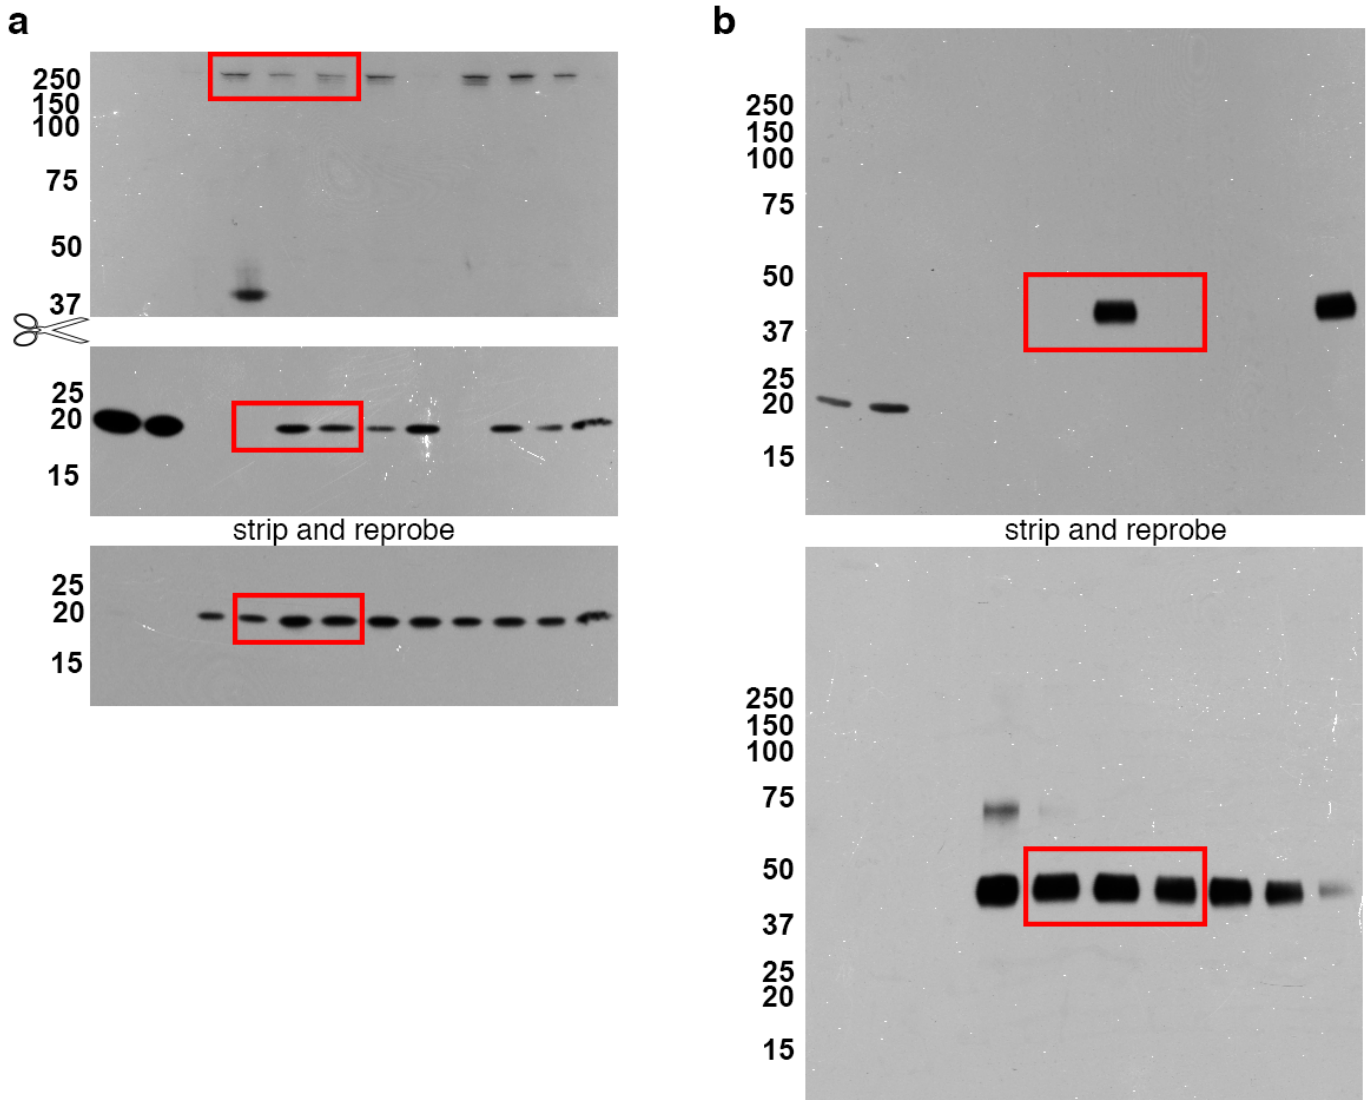

**Supplementary information Figure 5: Full Western blots associated with Figures 3c and 3d.** a. Proteins were separated by SDS-PAGE and transferred to PVDF membrane. The membrane was cut between the 37 kDa and 25 kDa molecular weight markers so that the top blot could be probed with an antibody against the TcdA CROPS domain and the middle blot could be probed for unglucosylated Rac1. After exposure to film, the middle blot was stripped and re-probed with an antibody against total Rac1. b. The membrane was initially probed with an antibody that recognizes unglucosylated Rac1. After exposure to film, the blot was stripped and re-probed with an antibody against total Rac1.

**References**

- 46 D'Urzo, N. *et al.* The structure of *Clostridium difficile* toxin A glucosyltransferase domain bound to Mn(2+) and UDP provides insights into glucosyltransferase activity and product release. *FEBS J* **279**, 3085-3097, doi:10.1111/j.1742-4658.2012.08688.x (2012).
- 47 Reinert, D. J., Jank, T., Aktories, K. & Schulz, G. E. Structural basis for the function of *Clostridium difficile* toxin B. *J Mol Biol* **351**, 973-981, doi:10.1016/j.jmb.2005.06.071 (2005).
- 48 Ziegler, M. O., Jank, T., Aktories, K. & Schulz, G. E. Conformational changes and reaction of clostridial glycosylating toxins. *J Mol Biol* **377**, 1346-1356, doi:10.1016/j.jmb.2007.12.065 (2008).
